# Supplementary material for: Cu-Doped magnetic loofah biochar for tetracycline degradation via peroxymonosulfate activation
Source: Royal Society of Chemistry journal article supplement (doi:10.1039/d2nj02885a), 2022-01-01
Supplement: d2nj02885a1.pdf [file d2nj02885a1.pdf]

## Supplementary Materials

### **Cu-doped magnetic loofah biochar for tetracycline degradation via permonosulfate activation**

Dajie Zhang <sup>a,b</sup>, Jiabao Sun <sup>a</sup>, Qiang Li <sup>a,b</sup>\*, Haocheng Song <sup>a</sup>, Dongsheng Xia <sup>a,b</sup>\*

<sup>a</sup> School of Environmental Engineering, Wuhan Textile University, Wuhan  
430073, PR China

<sup>b</sup> Engineering Research Center for Clean Production of Textile Dyeing and  
Printing, Ministry of Education, Wuhan 430073, PR China

**First author:** Dajie Zhang

E-mail addresses: 2007050@wtu.edu.cn

**\* Corresponding author:** Qiang Li, Dongsheng Xia

Tel.: +86-27-59367338.

E-mail addresses: qiangli@wtu.edu.cn (Qiang Li); dongsheng\_xia@wtu.edu.cn  
(Dongsheng Xia).

**Totally 6 pages including 4 Figures and 2 Tables.**

**Figures:**

**Fig. S1** The reusability of Fe<sub>2</sub>O<sub>3</sub>-LBC in PS activation process and the preparation of Cu-Fe-LBC.

**Fig. S2** EDS elemental analysis.

**Fig. S3** The degradation of TC by the Cu-Fe-LBC in real water.

**Fig. S4** The removal of TOC in the Cu-Fe-LBC system.

**Tables:**

**Table S1** The element content of Cu-Fe-LBC.

**Table S2** The main parameters of the real water samples.

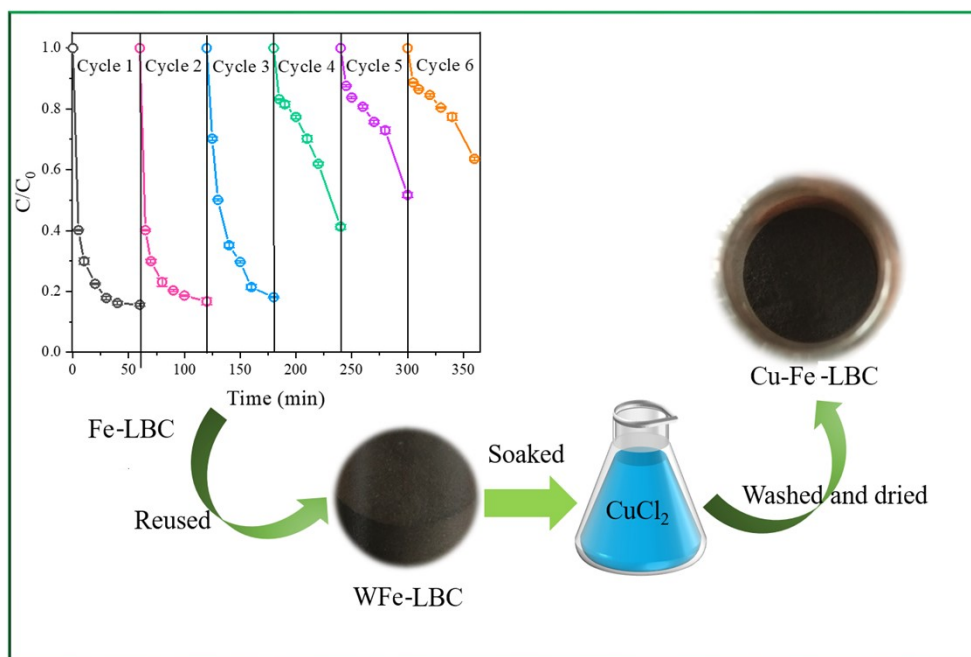

**Fig. S1** The reusability of Fe-LBC in PS activation process and the preparation of Cu-Fe-LBC.

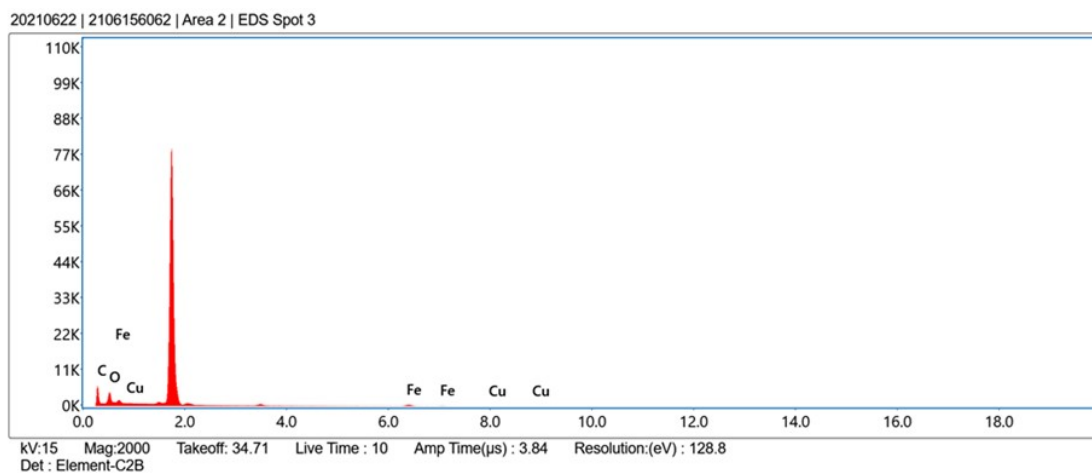

**Fig. S2** EDS elemental analysis.

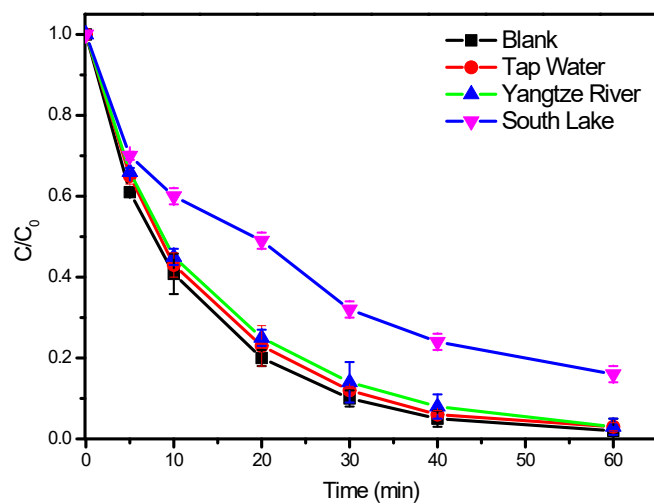

**Fig. S3** The degradation of TC by the Cu-Fe-LBC in real water.

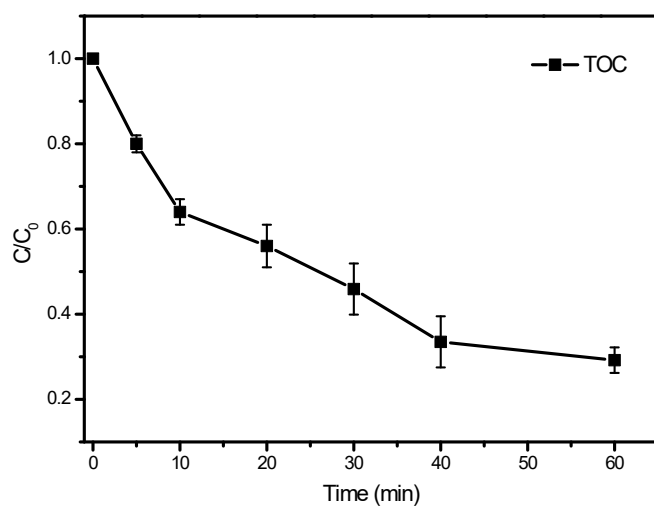

**Fig. S4** The removal of TOC in the Cu-Fe-LBC system.

**Table S1** The element content of Cu-Fe-LBC.

| Element | Weight % | Atomic % | Error % | Net Int. | K Ratio | Z      | A      | F      |
|---------|----------|----------|---------|----------|---------|--------|--------|--------|
| C K     | 42.98    | 56.89    | 6.86    | 3358.23  | 0.2269  | 1.0712 | 0.4929 | 1.0000 |
| O K     | 38.04    | 37.80    | 8.90    | 2677.09  | 0.1180  | 1.0203 | 0.3041 | 1.0000 |
| Fe K    | 16.17    | 4.60     | 6.58    | 543.98   | 0.1291  | 0.7603 | 1.0128 | 1.0368 |
| Cu K    | 2.81     | 0.70     | 36.85   | 47.41    | 0.0213  | 0.7197 | 1.0018 | 1.0500 |

**Table S2** The main parameters of the real water samples.

| Water samples                            | Yangtze River | South Lake | Tap water |
|------------------------------------------|---------------|------------|-----------|
| Temperature (°C)                         | 19.8          | 19.8       | 19.8      |
| pH                                       | 6.99          | 7.09       | 7.1       |
| Conductivity ( $\mu\text{S}/\text{cm}$ ) | 264.2         | 281.4      | 136.5     |
| Total organic carbon (mg/L)              | 3.6           | 4.8        | 1.6       |
